# Supplementary material for: Erythropoietin reduces experimental autoimmune encephalomyelitis severity via neuroprotective mechanisms
Source: Springer Nature journal article supplement (doi:10.1186/s12974-017-0976-5), 2017-10-13

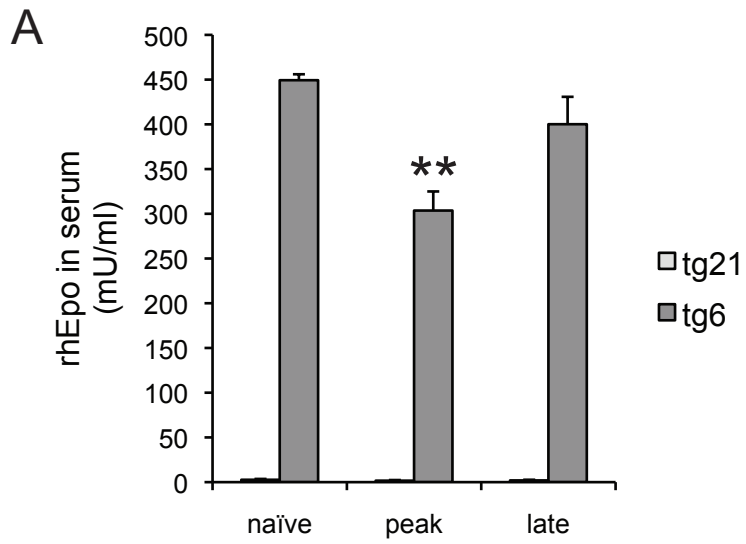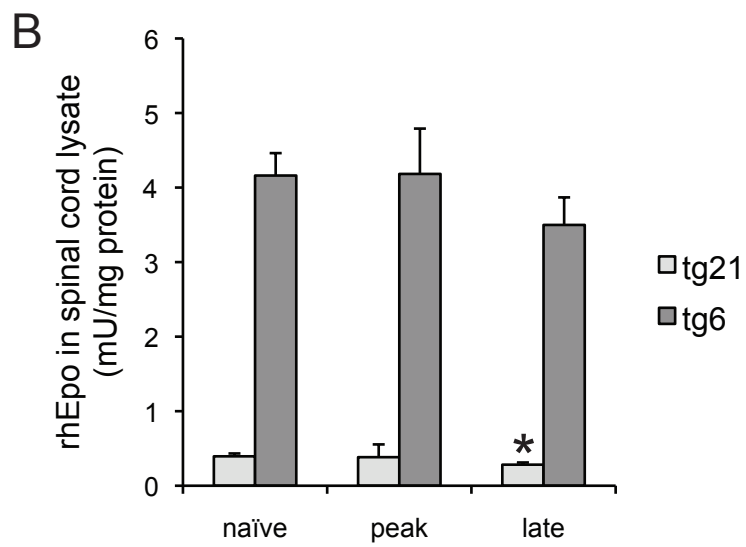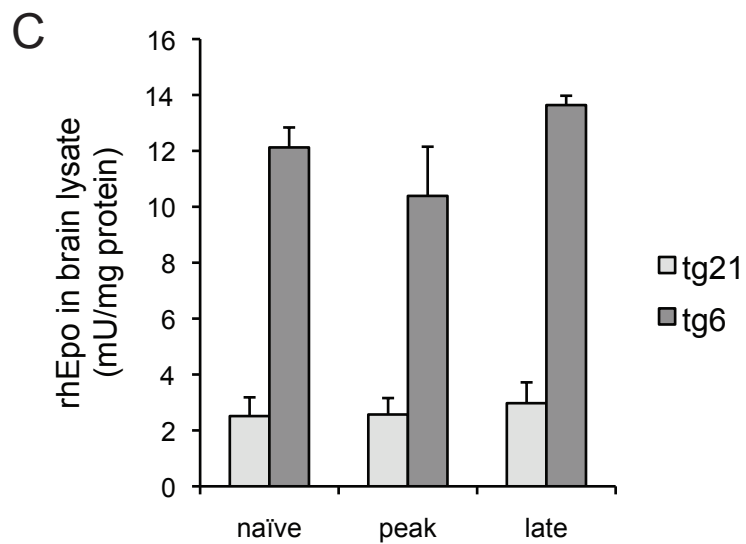

Supplement: MOESM1 [file 15132678]
