# Supplementary material for: Erythropoietin reduces experimental autoimmune encephalomyelitis severity via neuroprotective mechanisms
Source: Springer Nature journal article supplement (doi:10.1186/s12974-017-0976-5), 2017-10-13
Supplement: MOESM2 [file 15132678]

| Peak EAE | Population (% of CD45) | wt    |      |    | tg21  |      |   | tg6   |      |   | student's ttest |           |             |
|----------|------------------------|-------|------|----|-------|------|---|-------|------|---|-----------------|-----------|-------------|
|          |                        | Mean  | SEM  | N  | Mean  | SEM  | N | Mean  | SEM  | N | wt vs tg21      | wt vs tg6 | tg21 vs tg6 |
| CNS      | Microglia              | 28.97 | 1.69 | 9  | 27.72 | 0.27 | 3 | 22.93 | 3.01 | 6 | ns              | ns        | ns          |
|          | CD4+T Cells            | 16.49 | 3.92 | 9  | 25.10 | 1.01 | 3 | 15.48 | 3.88 | 6 | ns              | ns        | ns          |
|          | CD8+T cells            | 1.54  | 0.79 | 9  | 0.76  | 0.25 | 3 | 1.61  | 0.68 | 6 | ns              | ns        | ns          |
|          | Macrophages            | 6.52  | 1.21 | 9  | 0.95  | 0.14 | 3 | 13.91 | 3.92 | 6 | *               | *         | ns          |
|          | Dendritic cells        | 40.40 | 3.49 | 9  | 38.55 | 3.03 | 3 | 43.89 | 2.73 | 6 | ns              | ns        | ns          |
|          | B cells                | 2.92  | 0.93 | 9  | 4.78  | 1.01 | 3 | 4.01  | 1.42 | 6 | ns              | ns        | ns          |
|          | T regs (% of CD4)      | 4.51  | 0.94 | 9  | 4.16  | 0.22 | 3 | 4.17  | 0.58 | 6 | ns              | ns        | ns          |
| Spleen   | CD4+T Cells            | 13.11 | 0.87 | 12 | 13.08 | 0.89 | 6 | 6.27  | 0.82 | 6 | ns              | ***       | ***         |
|          | CD8+T cells            | 4.84  | 0.51 | 12 | 5.85  | 0.38 | 6 | 2.42  | 0.76 | 6 | ns              | *         | *           |
|          | Macrophages            | 35.44 | 4.08 | 12 | 37.88 | 2.56 | 6 | 23.88 | 3.86 | 6 | ns              | ns        | *           |
|          | Dendritic cells        | 2.14  | 0.27 | 12 | 2.55  | 0.53 | 6 | 3.25  | 0.36 | 6 | ns              | *         | ns          |
|          | B cells                | 12.97 | 1.14 | 12 | 15.98 | 2.01 | 6 | 11.35 | 0.95 | 6 | ns              | ns        | ns          |
|          | T regs (% of CD4)      | 2.86  | 0.39 | 12 | 2.96  | 0.42 | 6 | 2.52  | 0.52 | 6 | ns              | ns        | ns          |
| LN       | CD4+T Cells            | 25.16 | 2.78 | 12 | 26.12 | 1.32 | 6 | 8.64  | 1.36 | 6 | ns              | ***       | ***         |
|          | CD8+T cells            | 13.49 | 1.87 | 12 | 16.37 | 1.10 | 6 | 6.47  | 1.73 | 6 | ns              | *         | **          |
|          | Macrophages            | 2.30  | 0.18 | 12 | 2.41  | 0.28 | 6 | 2.36  | 0.34 | 6 | ns              | ns        | ns          |
|          | Dendritic cells        | 1.96  | 0.38 | 12 | 1.52  | 0.38 | 6 | 3.66  | 1.26 | 6 | ns              | ns        | ns          |
|          | B cells                | 34.67 | 3.28 | 12 | 29.93 | 1.91 | 6 | 25.72 | 5.22 | 6 | ns              | ns        | ns          |
|          | T regs (% of CD4)      | 5.32  | 0.61 | 12 | 5.93  | 0.76 | 6 | 4.34  | 0.73 | 6 | ns              | ns        | ns          |

| Late EAE | Population (% of CD45) | wt    |      |    | tg21  |      |   | tg6   |      |   | student's ttest |           |             |
|----------|------------------------|-------|------|----|-------|------|---|-------|------|---|-----------------|-----------|-------------|
|          |                        | Mean  | SEM  | N  | Mean  | SEM  | N | Mean  | SEM  | N | wt vs tg21      | wt vs tg6 | tg21 vs tg6 |
| CNS      | Microglia              | 21.82 | 2.09 | 12 | 27.17 | 2.89 | 6 | 18.72 | 0.70 | 6 | ns              | ns        | *           |
|          | CD4+T Cells            | 15.41 | 1.56 | 12 | 17.52 | 1.05 | 6 | 14.78 | 1.45 | 6 | ns              | ns        | ns          |
|          | CD8+T cells            | 0.92  | 0.25 | 12 | 1.89  | 0.29 | 6 | 0.54  | 0.28 | 6 | *               | ns        | *           |
|          | Macrophages            | 2.20  | 0.37 | 12 | 5.23  | 1.28 | 6 | 1.76  | 0.53 | 6 | *               | ns        | *           |
|          | Dendritic cells        | 57.80 | 3.73 | 12 | 47.42 | 4.36 | 6 | 59.92 | 7.42 | 6 | ns              | ns        | ns          |
|          | B cells                | 3.88  | 0.65 | 12 | 4.62  | 0.54 | 6 | 7.00  | 2.09 | 6 | ns              | ns        | ns          |
|          | T regs (% of CD4)      | 11.59 | 2.85 | 9  | 10.70 | 2.96 | 6 | 10.35 | 0.93 | 3 | ns              | ns        | ns          |
| Spleen   | CD4+T Cells            | 13.91 | 1.33 | 12 | 16.18 | 2.78 | 6 | 4.55  | 0.32 | 5 | ns              | ***       | *           |
|          | CD8+T cells            | 7.10  | 1.01 | 12 | 8.86  | 1.92 | 6 | 3.11  | 0.99 | 6 | ns              | *         | *           |
|          | Macrophages            | 14.24 | 3.15 | 12 | 10.36 | 4.50 | 6 | 19.97 | 2.52 | 6 | ns              | ns        | ns          |
|          | Dendritic cells        | 3.20  | 0.61 | 12 | 1.66  | 0.45 | 6 | 4.35  | 0.39 | 6 | ns              | ns        | **          |
|          | B cells                | 23.24 | 2.27 | 12 | 29.57 | 2.47 | 6 | 10.36 | 2.36 | 6 | ns              | *         | ***         |
|          | T regs (% of CD4)      | 2.52  | 0.49 | 12 | 4.17  | 0.60 | 6 | 1.83  | 0.56 | 6 | ns              | ns        | *           |
| LN       | CD4+T Cells            | 20.10 | 0.74 | 10 | 21.92 | 1.65 | 6 | 15.00 | 1.31 | 4 | ns              | *         | *           |
|          | CD8+T cells            | 16.46 | 1.30 | 10 | 15.67 | 2.52 | 6 | 11.86 | 2.00 | 4 | ns              | ns        | ns          |
|          | Macrophages            | 1.85  | 0.22 | 10 | 2.01  | 0.21 | 6 | 2.90  | 0.51 | 4 | ns              | *         | ns          |
|          | Dendritic cells        | 2.13  | 0.24 | 10 | 1.95  | 0.50 | 6 | 3.61  | 0.78 | 4 | ns              | *         | ns          |
|          | B cells                | 32.06 | 1.47 | 10 | 31.52 | 2.30 | 6 | 37.65 | 4.63 | 4 | ns              | ns        | ns          |
|          | T regs (% of CD4)      | 5.67  | 0.66 | 10 | 4.94  | 0.17 | 6 | 6.13  | 1.07 | 4 | ns              | ns        | ns          |
